# Supplementary material for: Corticosterone Inhibits LPS-Induced NLRP3 Inflammasome Priming in Macrophages by Suppressing Xanthine Oxidase
Source: Hindawi journal article supplement (doi:10.1155/2020/6959741), 2020-05-18
Supplement: f1 [file 6959741.f1.pdf]

---

**Corticosterone inhibits LPS-induced NLRP3 inflammasome priming  
in macrophages by suppressing xanthine oxidase**

**Supporting information**

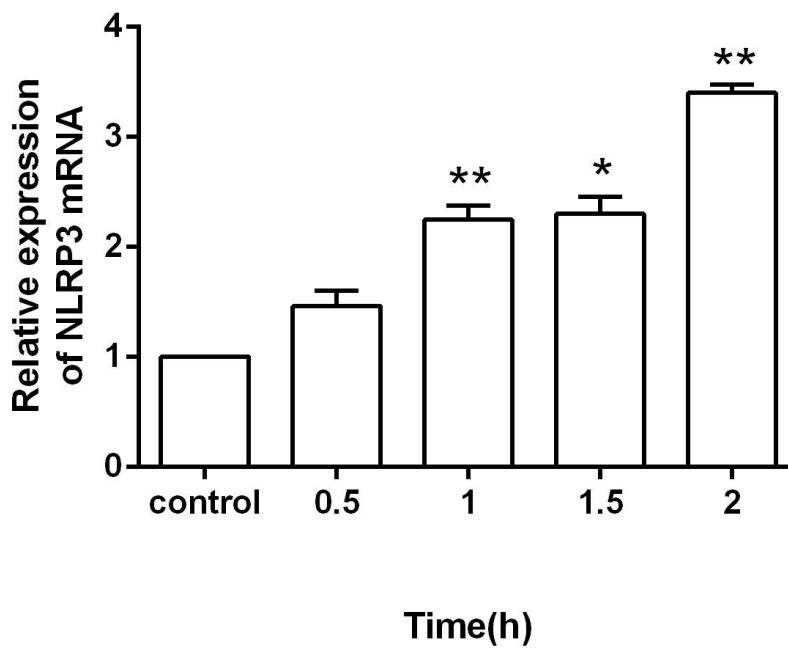

**Fig. S1** Expression of NLRP3 mRNA in RAW264.7 cells treated with LPS (1 µg/ml) for different times. In the control group the cells were stimulated with LPS at 0 h. Value are mean (s.d.) (n=5). \*  $P < 0.05$ , \*\*  $P < 0.01$  versus control.

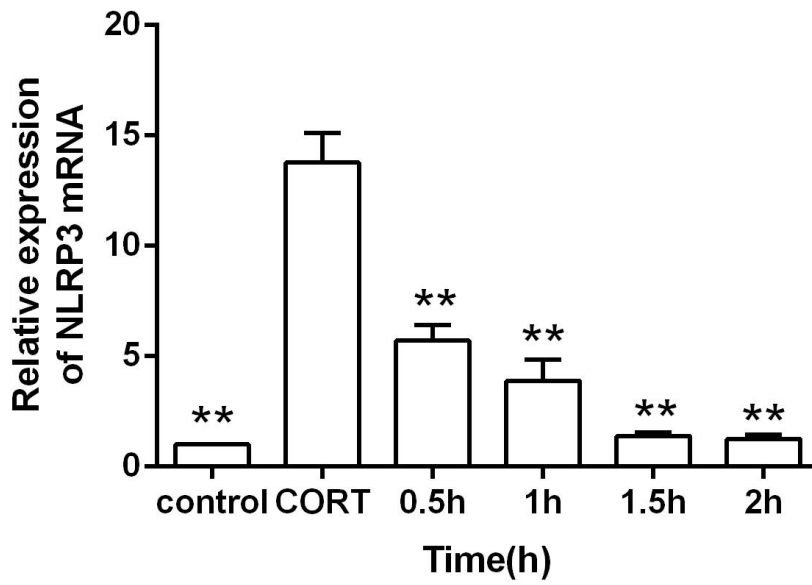

**Fig. S2** NLRP3 mRNA level in RAW264.7 cells treated with CORT and LPS. Cells were pretreated with 700 ng/ml CORT for 1 h and stimulated with LPS (1  $\mu$ g/ml) for different times. In the control group there were no treatments. In the CORT group, cells were pretreated with 700 ng/ml CORT for 1 h and stimulated with LPS at 0 h. Value are mean (s.d.) (n=6). \* P<0.05, \*\* P<0.01 *versus* CORT group.

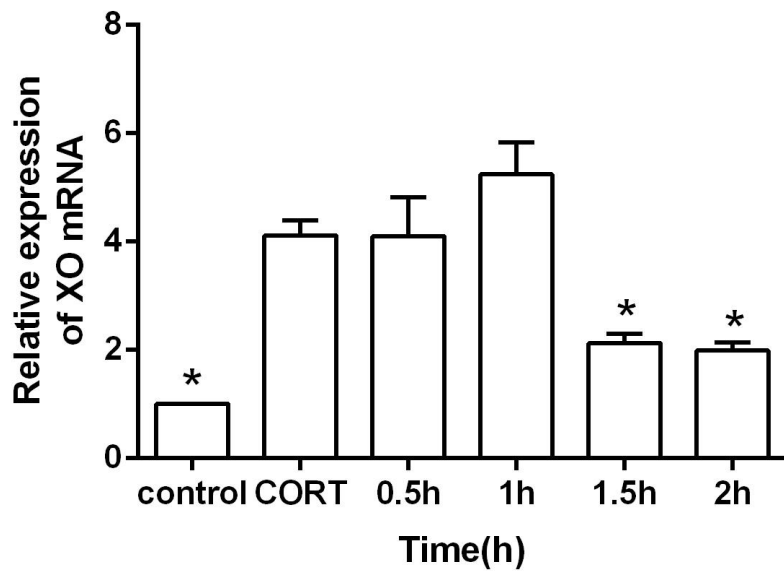

**Fig. S3** XO mRNA levels in RAW264.7 cells treated with CORT and LPS.

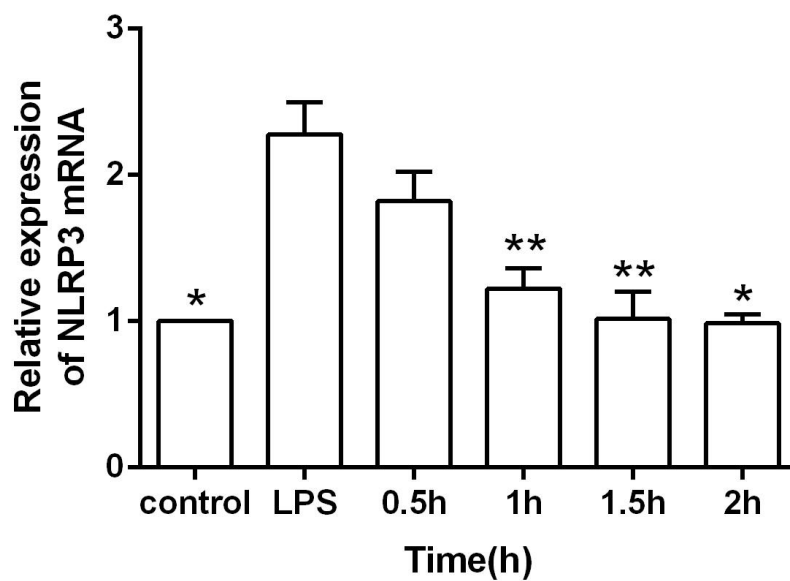

**Fig. S4** NLRP3 mRNA levels in RAW264.7 cells treated with allopurinol. Cell were pretreated with 250  $\mu\text{g/ml}$  of allopurinol for 1 h and stimulated with LPS(1  $\mu\text{g/ml}$ ) for different times. In the control group there were no treatment. In the LPS group, the time point for stimulation with LPS was 2h with no allopurinol pretreatment. Values are mean(s.d.) ( $n=6$ ). \*  $P<0.05$ , \*\*  $P<0.01$  versus LPS group.
